# Supplementary material for: Boosting the bifunctional electrocatalytic performance of nanowire NiCo2O4@ultrathin porous carbon via modulating the d-band center
Source: Royal Society of Chemistry journal article supplement (doi:10.1039/d4qi00821a), 2024-01-01
Supplement: d4qi00821a1.pdf [file d4qi00821a1.pdf]

**Supporting information**

**Boosting the bifunctional electrocatalytic performance of nanowire**

**NiCo<sub>2</sub>O<sub>4</sub>@ultrathin porous carbon via modulating d-band center**

Huiqin Yu <sup>a</sup>, Fang Li <sup>a\*</sup>, Jing Cao <sup>a</sup>, Shifu Chen <sup>a</sup>, Haili Lin <sup>a\*</sup>

<sup>a</sup>Key Laboratory of Green and Precise Synthetic Chemistry and Applications,  
Ministry of Education; College of Chemistry and Materials Science, Huaibei Normal  
University, Huaibei, Anhui 235000, P. R. China

\*Corresponding author.

E-mail address: lifang14@mails.ucas.ac.cn (Fang Li); linhaili@mail.ipc.ac.cn (Haili  
Lin)

|                                                                                                                                        |    |
|----------------------------------------------------------------------------------------------------------------------------------------|----|
| Figure S1. N <sub>2</sub> adsorption-desorption isotherms of NiCo <sub>2</sub> O <sub>4</sub> and NiCo <sub>2</sub> O <sub>4</sub> /C. | 3  |
| Figure S2. XPS full survey spectrum of NiCo <sub>2</sub> O <sub>4</sub> /C sample.                                                     | 3  |
| Figure S3. Energy Dispersive Spectrometer of the NiCo <sub>2</sub> O <sub>4</sub> /C.                                                  | 4  |
| Figure S4. High-resolution C 1s XPS spectra of the NiCo <sub>2</sub> O <sub>4</sub> /C/NF.                                             | 4  |
| Figure S5. High-resolution O 1s XPS spectra of the NiCo <sub>2</sub> O <sub>4</sub> /C/NF.                                             | 5  |
| Figure S6. The EIS of the NiCo <sub>2</sub> O <sub>4</sub> /C/NF, NiCo <sub>2</sub> O <sub>4</sub> /NF, C/NF, and NF.                  | 5  |
| Figure S7. The CV of the NiCo <sub>2</sub> O <sub>4</sub> /C/NF, NiCo <sub>2</sub> O <sub>4</sub> /NF, and C/NF.                       | 6  |
| Figure S8. The HPLC result of the NiCo <sub>2</sub> O <sub>4</sub> /C/NF, NiCo <sub>2</sub> O <sub>4</sub> /NF, and C/NF.              | 6  |
| Figure S9 The comparison of whole reaction in BA electrolyte and overall water splitting reaction                                      | 7  |
| Figure S10. The LSV curve before and after long term whole reaction.                                                                   | 8  |
| Figure S11. The SEM after long-term HER and BA oxidation.                                                                              | 8  |
| Figure S12. The TEM after long-term HER and BA oxidation.                                                                              | 9  |
| Table S1 The comparison of HER property.                                                                                               | 10 |
| Detail calculation method                                                                                                              | 13 |

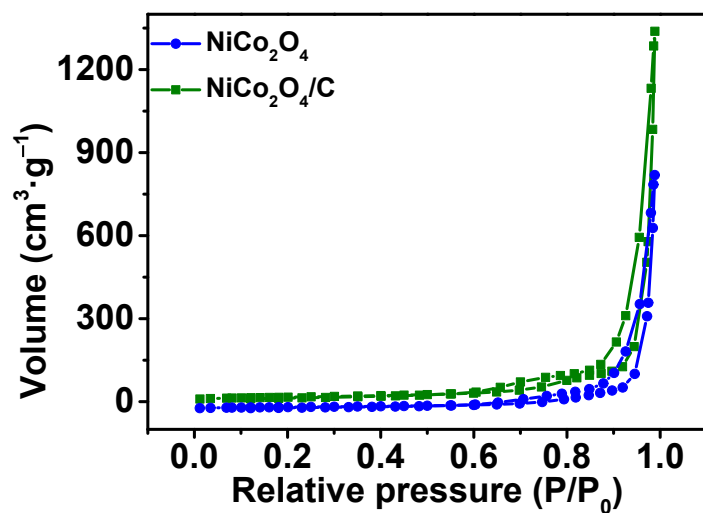

Figure S1. N<sub>2</sub> adsorption-desorption isotherms of NiCo<sub>2</sub>O<sub>4</sub> and NiCo<sub>2</sub>O<sub>4</sub>/C.

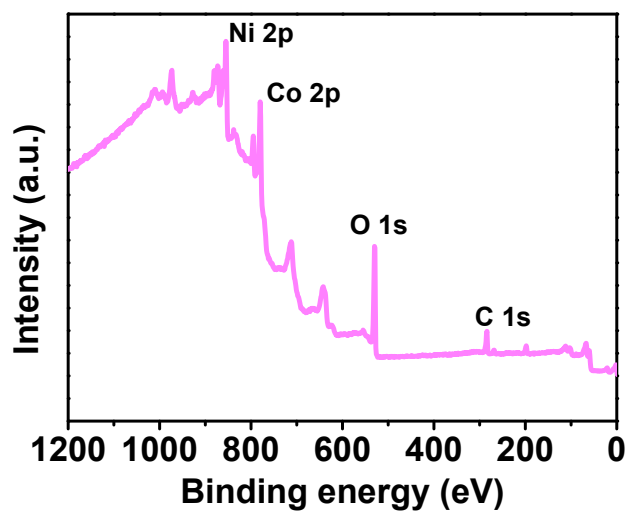

Figure S2. XPS full survey spectrum of NiCo<sub>2</sub>O<sub>4</sub>/C sample.

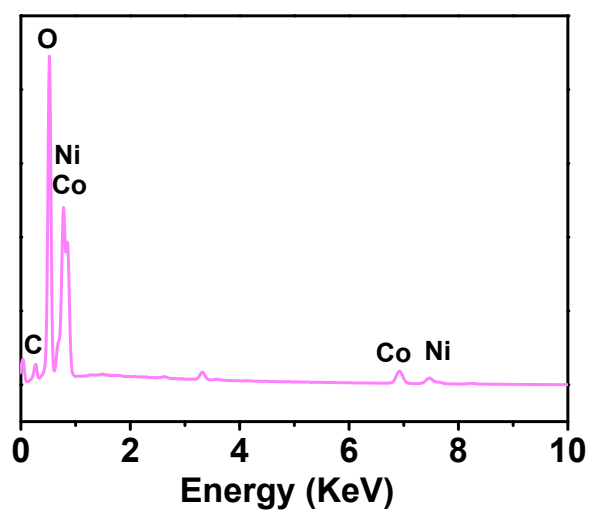

Figure S3. Energy Dispersive Spectrometer of the NiCo<sub>2</sub>O<sub>4</sub>/C.

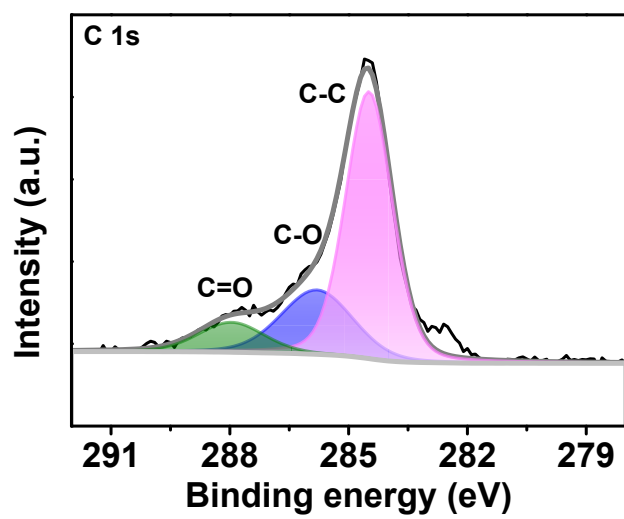

Figure S4. High-resolution C 1s XPS spectra of the NiCo<sub>2</sub>O<sub>4</sub>/C/NF.

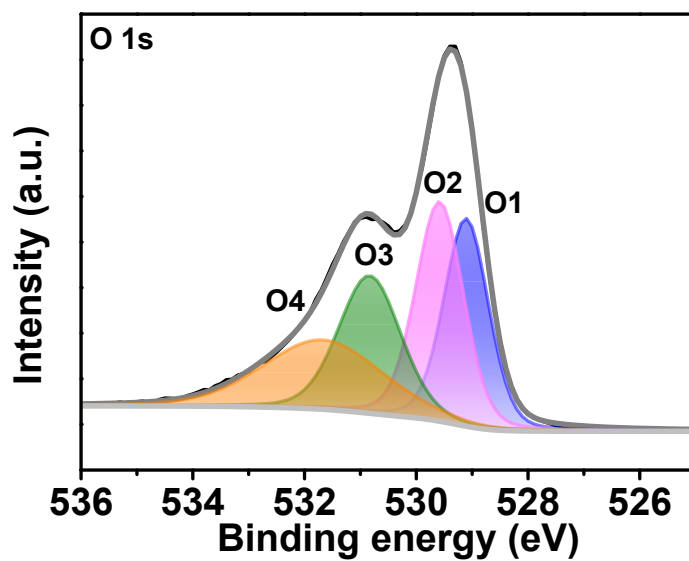

Figure S5. High-resolution O 1s XPS spectra of the NiCo<sub>2</sub>O<sub>4</sub>/C/NF.

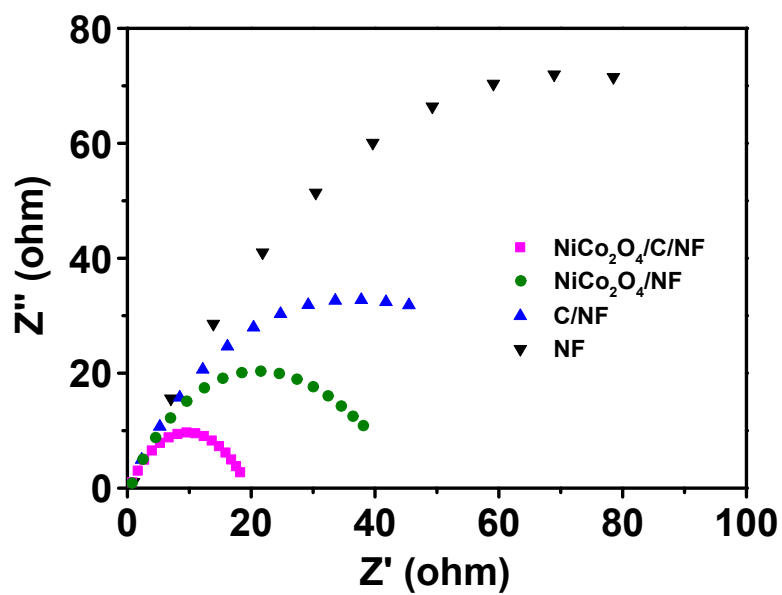

Figure S6. The EIS of the NiCo<sub>2</sub>O<sub>4</sub>/C/NF, NiCo<sub>2</sub>O<sub>4</sub>/NF, C/NF, and NF.

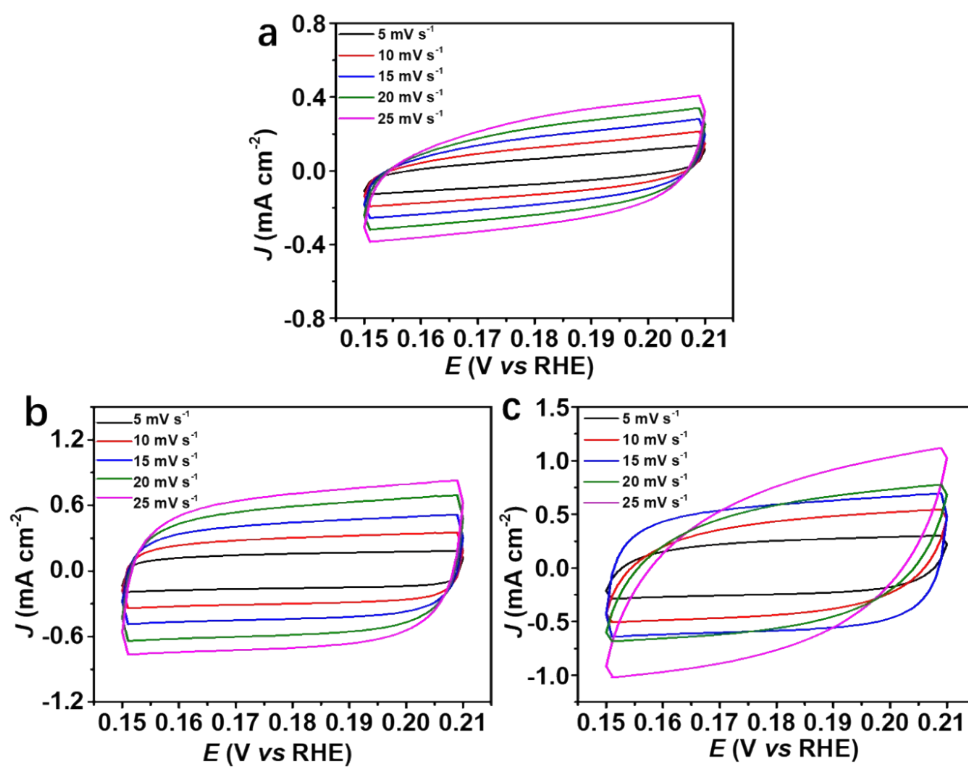

**Figure S7.** The CV of the NiCo<sub>2</sub>O<sub>4</sub>/C/NF, NiCo<sub>2</sub>O<sub>4</sub>/NF, and C/NF.

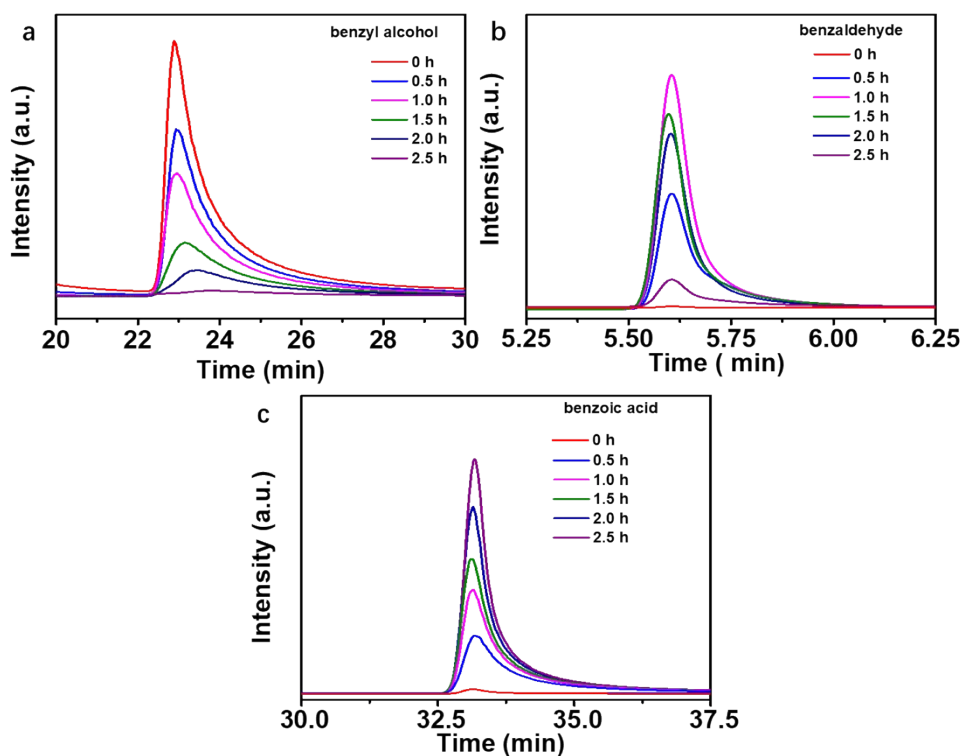

**Figure S8.** The HPLC result of the NiCo<sub>2</sub>O<sub>4</sub>/C/NF, NiCo<sub>2</sub>O<sub>4</sub>/NF, and C/NF.

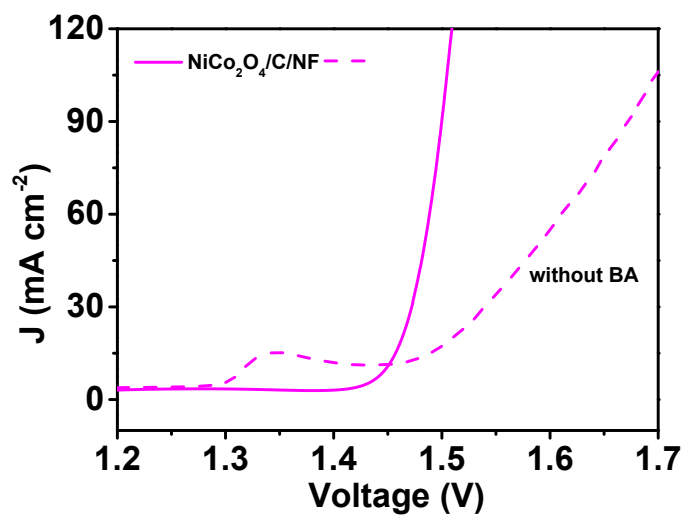

**Figure S9** The comparison of whole reaction in BA electrolyte and overall water-splitting reaction in electrolyte free of BA.

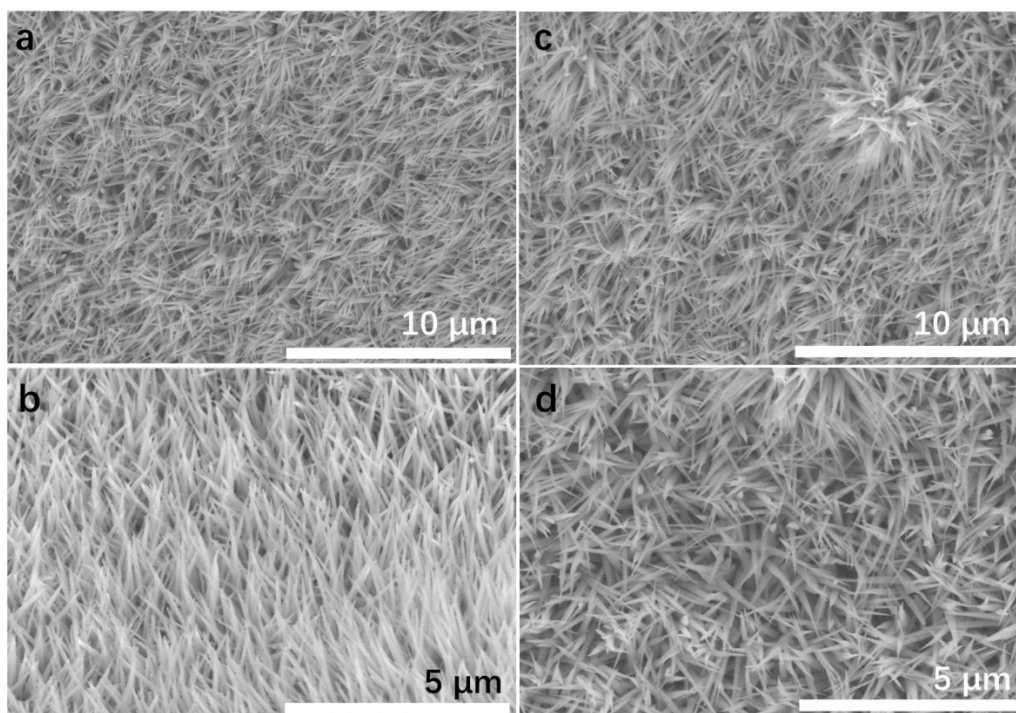

**Figure S10.** The SEM after long-term HER (a and b) and BA oxidation (c and d).

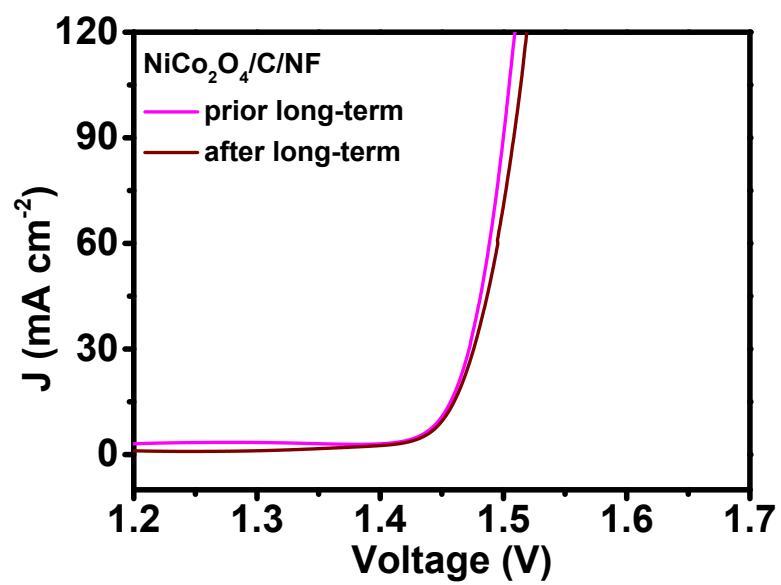

**Figure S11** The LSV curve before and after long term whole reaction.



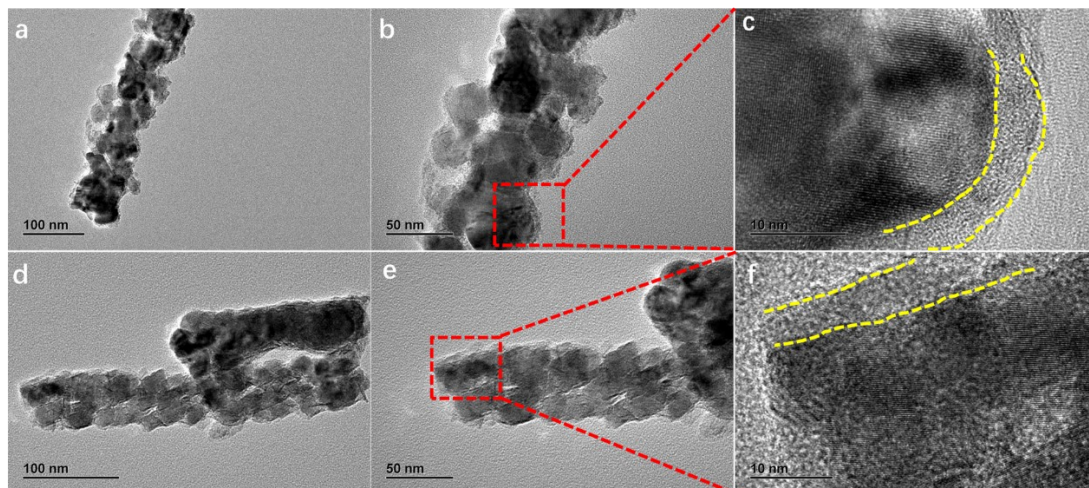

**Figure S12** The TEM for the long-term HER (a, b, and c) and BA oxidation (d, e, and f)

**Table S1 Comparison of HER property**

| Catalyst                                                              | Electrolyte | Overpotential<br>(10 mA cm <sup>-2</sup> ) | Ref. |
|-----------------------------------------------------------------------|-------------|--------------------------------------------|------|
| Vc-FeP                                                                | 1 M KOH     | 108                                        | 1    |
| CoSe <sub>2</sub> /a-CoP                                              | 1 M KOH     | 151                                        | 2    |
| NiCo-LDH@Cu(OH) <sub>2</sub> /CF                                      | 1 M KOH     | 263                                        | 3    |
| Co-Co <sub>2</sub> C/CC                                               | 1 M KOH     | 96                                         | 4    |
| Co <sub>2</sub> P                                                     | 1 M KOH     | 190                                        | 5    |
| NiFe alloy                                                            | 1 M KOH     | 236                                        | 6    |
| Co <sub>2</sub> FeO <sub>4</sub> @PdO                                 | 1 M KOH     | 269                                        | 7    |
| Ni@NCS-800                                                            | 1 M KOH     | 330                                        | 8    |
| Cu-Ni (1:1) @NRG                                                      | 1 M KOH     | 107                                        | 9    |
| Fe-Ni <sub>3</sub> S <sub>2</sub> /Ni <sub>2</sub> P                  | 1 M KOH     | 112                                        | 10   |
| C@NiCo <sub>12</sub>                                                  | 1 M KOH     | 105                                        | 11   |
| MoS <sub>2</sub>                                                      | 1 M KOH     | 248                                        | 12   |
| Co-Mo <sub>2</sub> C-0.020                                            | 1 M KOH     | 140                                        | 13   |
| W <sub>2</sub> N/WC                                                   | 1 M KOH     | 148.5                                      | 14   |
| CoP-NC@NFP                                                            | 1 M KOH     | 162                                        | 15   |
| Ni <sub>5</sub> P <sub>4</sub> /Ni <sub>2</sub> P/Fe <sub>2</sub> P-2 | 1 M KOH     | 190                                        | 16   |

[1] W.L. Kwong, E. Gracia-Espino, C.C. Lee, R. Sandström, T. Wågberg, J. Messinger, Cationic vacancy defects in iron phosphide: a promising route toward efficient and stable hydrogen evolution by electrochemical water splitting, *ChenSusChem* 10 (2017) 4544-4551.

[2] S.J. Shen, Z.P. Wang, Z.P. Lin, K. Song, Q.H. Zhang, F.Q. Meng, L. Gu, W.W. Zhong, Crystalline-amorphous interfaces coupling of CoSe<sub>2</sub>/CoP with optimized d-band center and boosted electrocatalytic hydrogen evolution, *Adv. Mater.* 34 (2022) 2110631.

[3] P.Y. Wang, J.W. Zhu, Z.H. Pu, R. Qin, C.T. Zhang, D. Chen, Q. Liu, D.L. Wu, W.Q. Li, S.L. Liu, J.S. Xiao, S.C. Mu, Interfacial engineering of Co

nanoparticles/Co<sub>2</sub>C nanowires boosts overall water splitting kinetics, *Appl. Catal. B: Environ.* 296 (2021) 120334.

[4] S.M. Li, L. Bai, H.B. Shi, X.F. Hao, L. Chen, X.J. Qin, G.J. Shao, Mo-doped CoP nanosheets as high-performance electrocatalyst for HER and OER, *Ionics* 27 (2021), 3109-3118.

[5] B.T. Jebaslinhepzybai, T. Partheeban, D.S. Gavali, R. Thapa, M. Sasidharan, One-pot solvothermal synthesis of Co<sub>2</sub>P nanoparticles: an efficient HER and OER electrocatalysts, *Int. J. Hydrogen Energy* 46 (2021) 21924-21938.

[6] C.L. Huang, X.F. Chuah, C.T. Hsieh, S.Y. Lu, NiFe alloy nanotube arrays as highly efficient bifunctional electrocatalysts for overall water splitting at high current densities, *ACS Appl. Mater. Interfaces* 11 (2019) 24096-24106.

[7] A. Hanan, M.N. Lakhan, D. Shu, A. Hussain, M. Ahmed, I.A. Soomro, V. Kumar, D.X. Cao, An efficient and durable bifunctional electrocatalyst based on PdO and Co<sub>2</sub>FeO<sub>4</sub> for HER and OER, *Int. J. Hydrogen Energy* 48 (2023) 19494-19508.

[8] K.B. Patel, B. Parmar, K. Ravi, R. Patidar, J.C. Chaudhari, D.N. Srivastava, G.R. Bhadu, Metal-organic framework derived core-shell nanoparticles as high performance bifunctional electrocatalysts for HER and OER, *Appl. Surf. Sci.* 616 (2023) 156499.

[9] D.E. Lee, S. Moru, K.P. Reddy, W.K. Jo, S. Tonda, Bimetallic Cu-Ni core-shell nanoparticles anchored N-doped reduced graphene oxide as a high-performance bifunctional electrocatalyst for alkaline water splitting, *Appl. Surf. Sci.* 622 (2023) 156928.

[10] X.Y. Wang, X. Yu, J.L. Bai, G.J. Yuan, P.Y. He, Y.Q. Zhu, S.Wu, F. Qin, L.L. Ren, Interface engineering assisted Fe-Ni<sub>3</sub>S<sub>2</sub>/Ni<sub>2</sub>P heterostructure as a high-performance bifunctional electrocatalyst for OER and HER, *Electrochim. Acta* 458 (2023) 142524.

- [11] S.F. Tan, W.M. yang, Y.J. Ji, Q.W. Hong, Carbon wrapped bimetallic NiCo nanospheres toward excellent HER and OER performance, *J. Alloys Compd.* 889 (2021) 161528.
- [12] B. Chen, P. Hu, F. Yang, X.J. Hua, F.F. Yang, F. Zhu, R.Y. Sun, K. Hao, K. Wang, Z.Y. Yin, In situ porousized MoS<sub>2</sub> nano islands enhance HER/OER bifunctional electrocatalysis, *Small* 19 (2023) 2207177.
- [13] H.L. Lin, N. Liu, Z.P. Shi, Y.L. Guo, Y. Tang, Q.S. Gao, Cobalt-doping in molybdenum-carbide nanowires toward efficient electrocatalytic hydrogen evolution, *Adv. Funct. Mater.* 26 (2016) 5590-5598.
- [14] J.X. Diao, Y. Qiu, S.Q. Liu, W.T. Wang, K. Chen, H.L. Li, W.Y. Yuan, Y.T. Qu, X.H. Guo, Interfacial engineering of W<sub>2</sub>N/WC heterostructures derived from solid-state synthesis: a highly efficient trifunctional electrocatalyst for ORR, OER, and HER, *Adv. Mater.* 32 (2020) 1905679.
- [15] E. Vijayakumar, S. Ramakrishnan, C. Sathiskumar, D.J. Yoo, J. Balamurugan, H.S. Noh, D. Kwon, Y.H. Kim, H. Lee, MOF-derived CoP-nitrogen-doped carbon@NiFeP nanoflakes as an efficient and durable electrocatalyst with multiple catalytically active sites for OER, HER, ORR and rechargeable zinc-air batteries, *Chem. Eng. J.* 428 (2022) 131115.
- [16] S.J. Sun, C.Y. Zhang, M.X. Ran, Y.J. Zheng, C.H. Li, Y. Jiang, X.M. Yan, Fe-doped promotes phosphorization and dispersibility of Ni catalysts for efficient and stable HER and OER, *Int. J. Hydrogen Energy* 63 (2024) 133-141.

All the DFT calculations were conducted based on the Vienna Ab-initio Simulation Package (VASP) [1-2]. The exchange-correlation effects were described by the Perdew-Burke-Ernzerhof (PBE) functional within the generalized gradient approximation (GGA) method [3-4]. The core-valence interactions were accounted by the projected augmented wave (PAW) method [5]. The energy cutoff for plane wave expansions was set to 500 eV, and the 3×3×1 Monkhorst-Pack grid k-points were selected to sample the Brillouin zone integration. The vacuum space is adopted 15 Å above the surfaces to avoid periodic interactions. The structural optimization was completed for energy and force convergence set at 1.0×10<sup>-4</sup> eV and 0.02 eV Å<sup>-1</sup>, respectively.

The Gibbs free energy change ( $\Delta G$ ) of each step is calculated using the following formula:

$$\Delta G = \Delta E + \Delta ZPE - T\Delta S$$

where  $\Delta E$  is the electronic energy difference directly obtained from DFT calculations,  $\Delta ZPE$  is the zero point energy difference, T is the room temperature (298.15 K) and  $\Delta S$  is the entropy change. ZPE could be obtained after frequency calculation by [6]:

$$ZPE = \frac{1}{2} \sum h\nu_i$$

And the TS values of adsorbed species are calculated according to the vibrational frequencies [7]:

$$TS = k_B T \left[ \sum_k \ln \left( \frac{1}{1 - e^{-h\nu/k_B T}} \right) + \sum_k \frac{h\nu}{k_B T} \frac{1}{(e^{h\nu/k_B T} - 1)} + 1 \right]$$

## References

- [1] G. Kresse, J. Hafner, Ab initio molecular dynamics for liquid metals, *Phys. Rev. B* 47 (1993) 558-561.
- [2] G. Kresse, J. Hafner, Ab initio molecular-dynamics simulation of the liquid-metal-amorphous-semiconductor transition in germanium, *Phys. Rev. B* 49 (1994) 14251-14269.
- [3] J. P. Perdew, K. Burke, M. Ernzerhof, Generalized gradient approximation made simple, *Phys. Rev. Lett.* 77 (1996) 3865-3868.

- [4] G. Kresse, D. Joubert, From ultrasoft pseudopotentials to the projector augmented-wave method, *Phys. Rev. B* 59 (1999) 1758-1775.
- [5] P. E. Blöchl, Projector augmented-wave method, *Phys. Rev. B* 50 (1994) 17953-17979.
- [6] Nørskov JK, Rossmeisl J, Logadottir A, Lindqvist L, Kitchin JR, Bligaard T, Jonsson H, Origin of the overpotential for oxygen reduction at a fuel-cell cathode, *J. Phys. Chem. B* 108 (2004) 17886–17892.
- [7] Bendavid LI, Carter EA, CO<sub>2</sub> adsorption on Cu<sub>2</sub>O(111): A DFT+U and DFT-D study, *J. Phys. Chem. C* 117 (2013) 26048–26059.
